# Supplementary material for: Dynamic base station planning with power adaptation for green wireless cellular networks
Source: Springer Nature journal article supplement (doi:10.1186/1687-1499-2014-77), 2014-05-15

**a**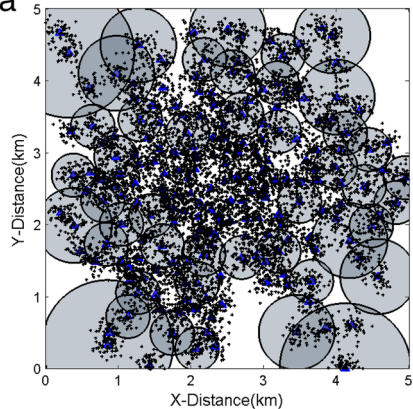**b**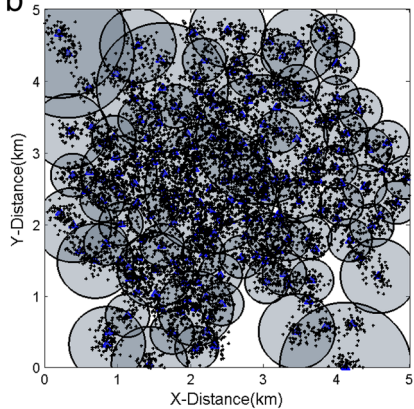**c**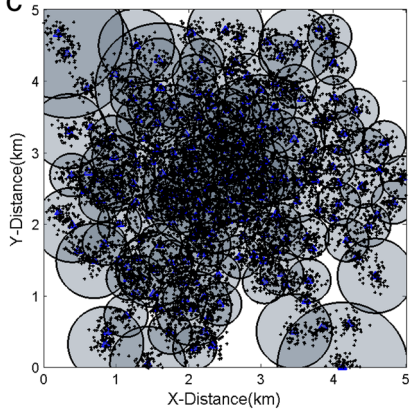

Supplement: 13638_2013_912_MOESM10_ESM.pdf [file 13638_2013_912_MOESM10_ESM.pdf]
